# Supplementary material for: Use of X-Ray Mutagenesis to Increase Genetic Diversity of <em>Zantedeschia aethiopica</em> for Early Flowering, Improved Tolerance to Bacterial Soft Rot and Higher Yield
Source: Preprints.org preprint supplement (doi:10.20944/preprints202111.0574.v1), 2021-11-30
Supplement: Supplementary file 1 [file supplementary]

Use of X-ray mutagenesis to increase genetic diversity of *Zantedeschia aethiopica* for early flowering, improved tolerance to bacterial soft rot and higher yield

Noam Reznik 1*, Bijaya Sharma Subedi 1, 2, Shoshana Weisman 3, Gavriel Friesem 1, Nir Carmi 4, Iris Yedidia 1,* and Michal Sharon-Cohen 5

**Supplementary File**


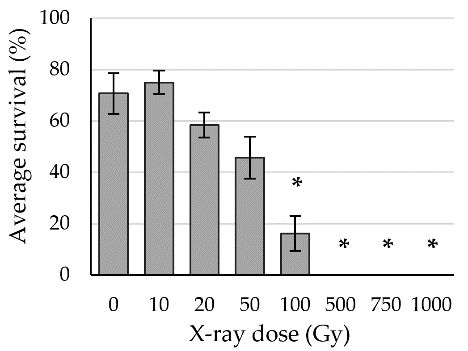


**Figure S1**. Calibration of the radiation dose for *Zantedeschia aethiopica* seeds. The bars represent average survival of the germinating seedlings, with standard errors. Significant doses are marked with an asterisk (*p* < 0.05). Gy = Gray.


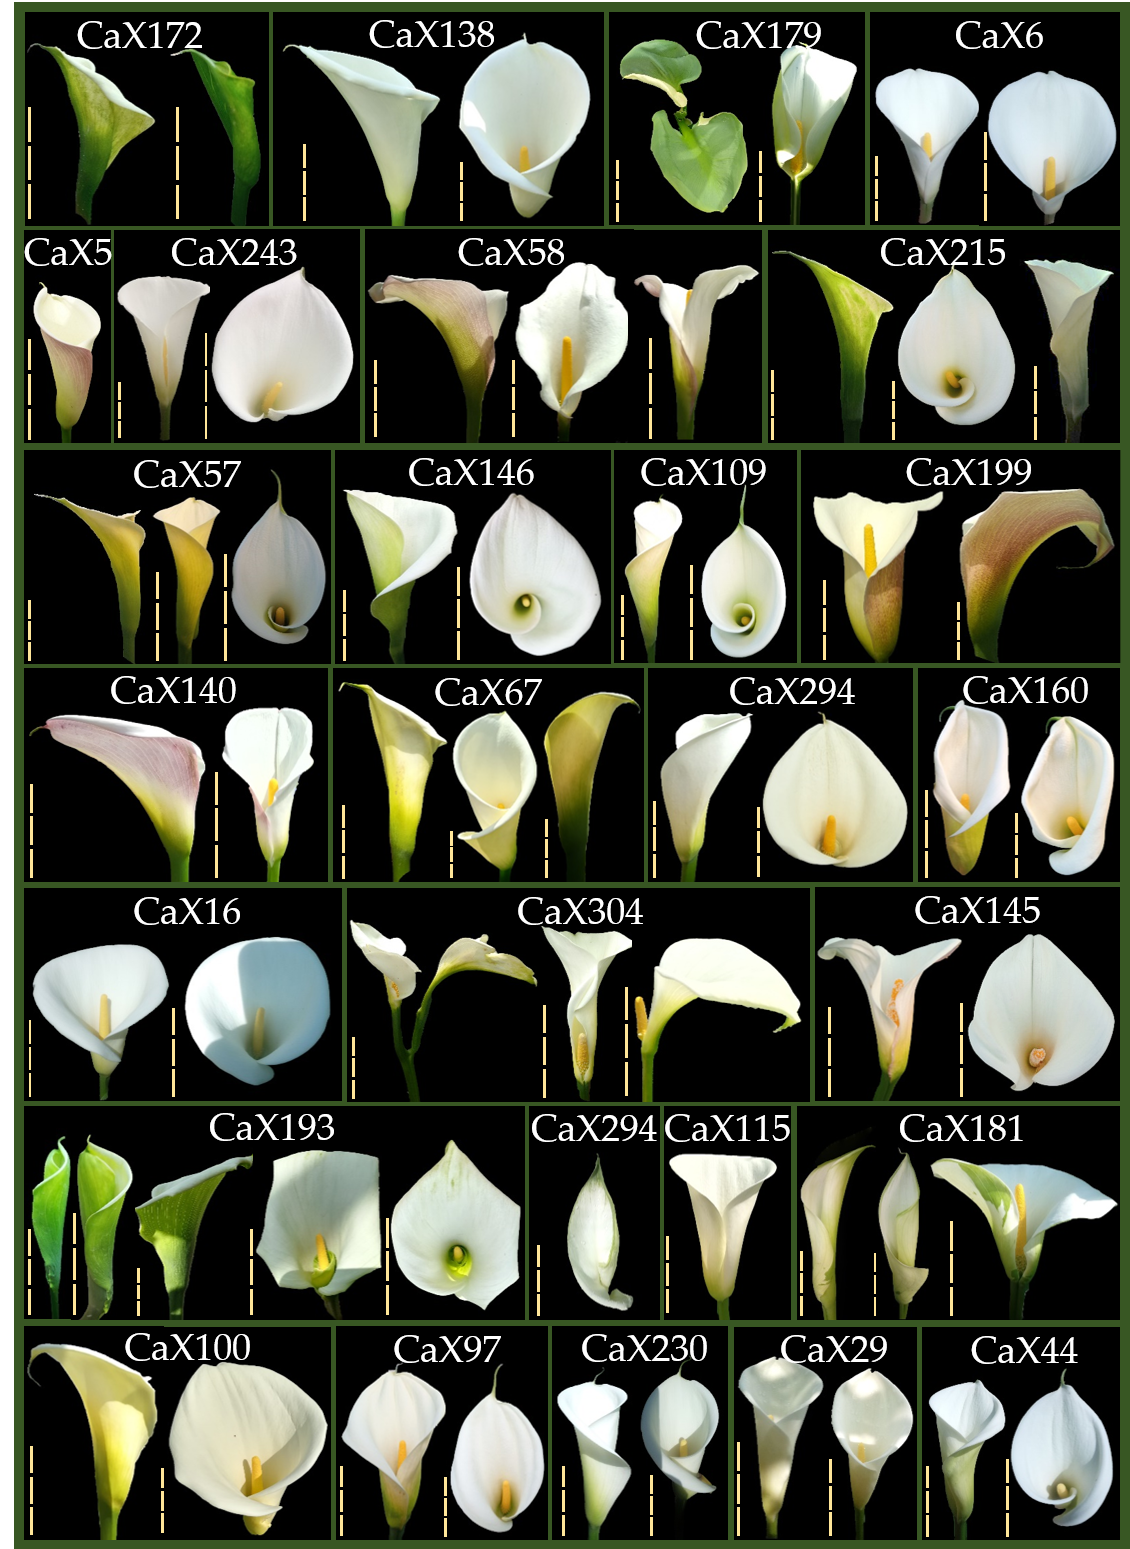


**Figure S2.** Flower diversity of mutated lines (*CaX*) during two growing seasons (2018-2020). The line labels are marked above the flowers. The vertical yellow dashed bar on the left of each image represents a length of 6 cm.
